# Supplementary material
Source: PubMed Central journal article supplement (PMC4194122)
Supplement: embj0033-1321-sd1.pdf [file embj0033-1321-sd1.pdf]

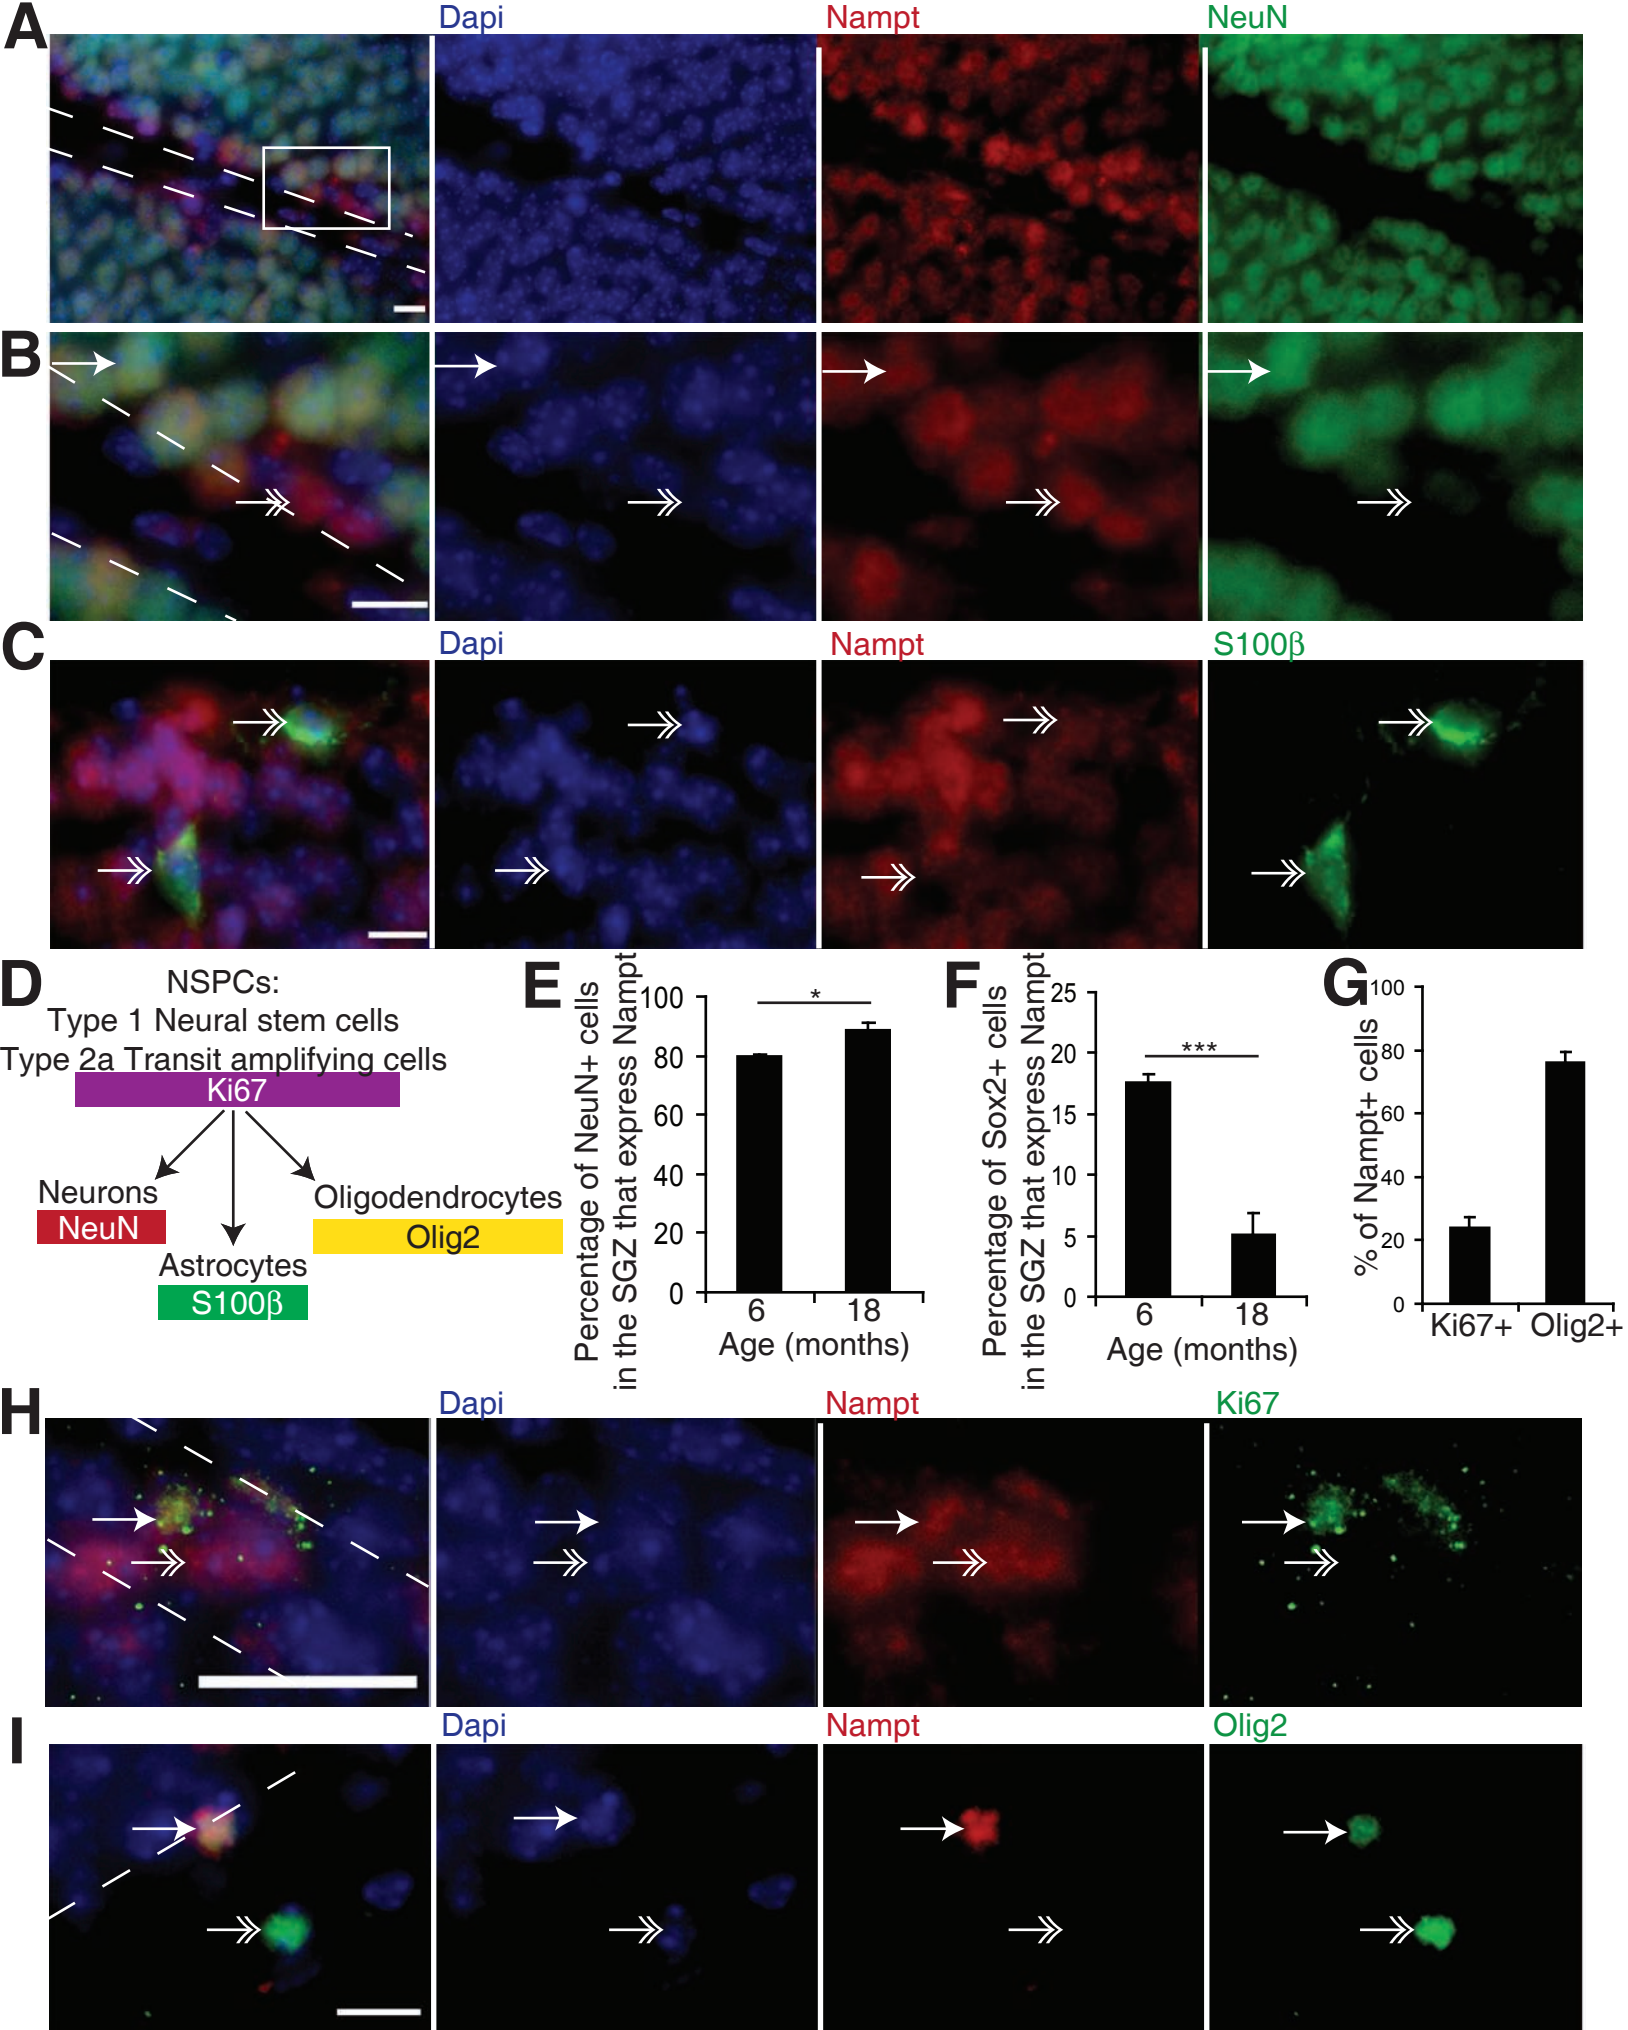

SUPPLEMENTARY FIGURE S1

**Supplementary Figure S1. Nampt is expressed in a subpopulation of SGZ NSPCs.**

**A-C, H-I)** Representative images of immunofluorescence for Dapi (blue), Nampt (red), and cell type specific markers (NeuN: mature neurons, S100 $\beta$ : mature astrocytes, Ki67: proliferating cells, Olig2: oligodendrocyte lineage cells; green) in the subgranular zone (SGZ). Dotted lines denote the SGZ. Single arrowheads indicate examples of colocalization. Double arrowheads indicate examples of non-colocalization. Scale bars denote 10  $\mu$ m. **B)** Zoom of boxed region shown in **A)**. **D)** A scheme for the specificity of the markers assessed. **E)** Percentage of Dapi+ cells that express the neuronal marker NeuN in the SGZ (n=5). **F)** Percentage of Dapi+ cells that express the NSPC marker Sox2 in the SGZ (n=5). **G)** Quantification of the percentages of marker-positive cells that also express Nampt in the SGZ (Ki67: n=304 cells from 13 mice; Olig2: n=122 cells from 10 mice). Data are presented as mean  $\pm$  s.e.m. \*P < 0.05. \*\*\*P < 0.001.
