# Supplementary material
Source: PubMed Central journal article supplement (PMC4194122)
Supplement: embj0033-1321-sd3.pdf [file embj0033-1321-sd3.pdf]

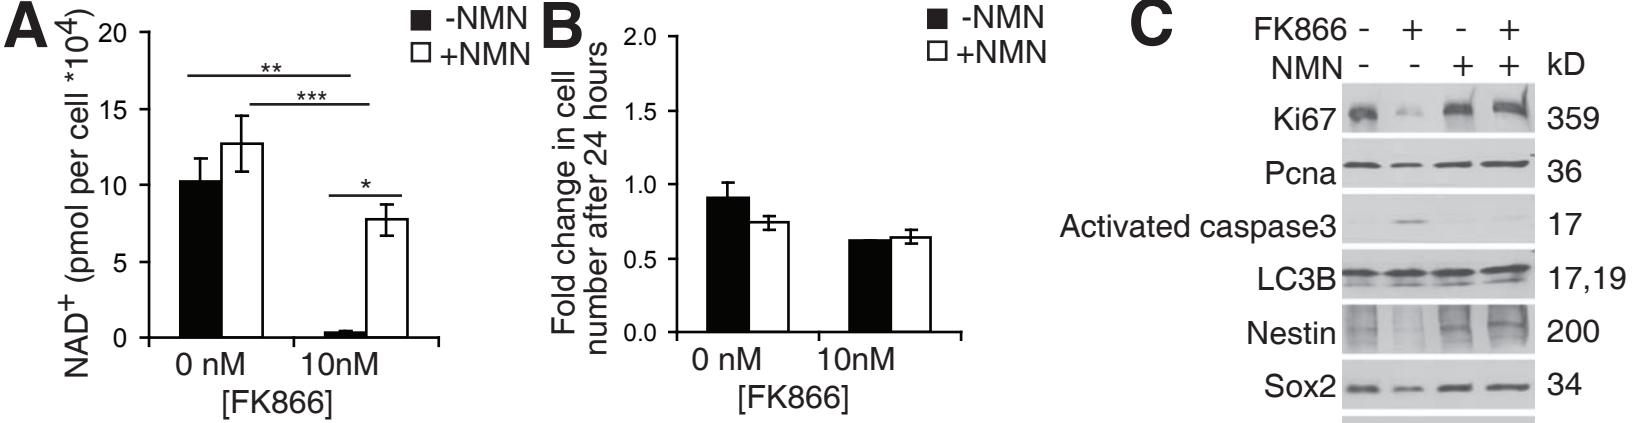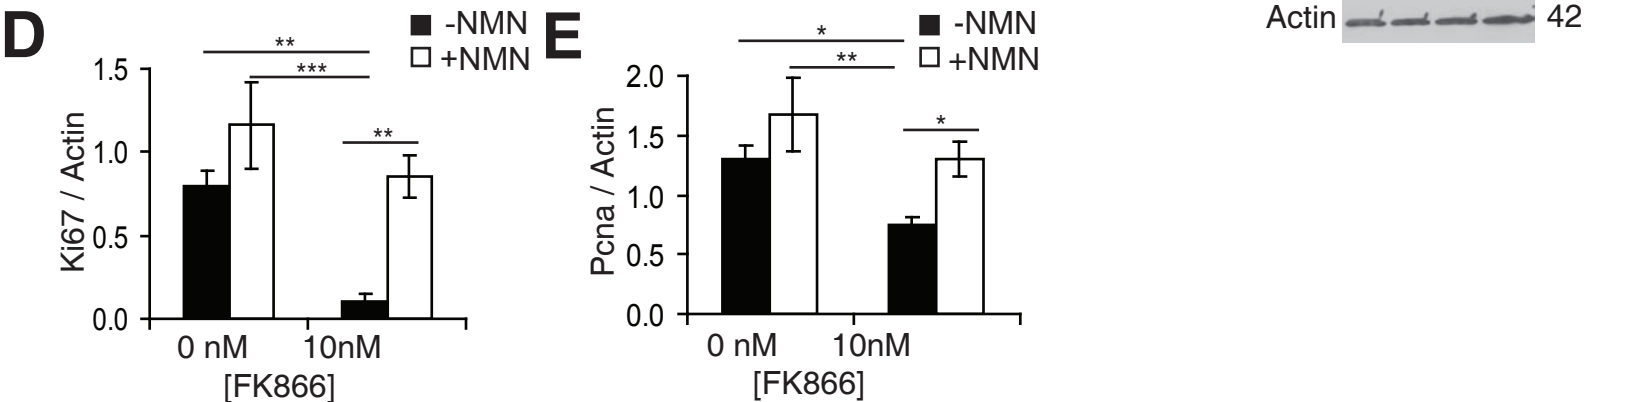

**F Top 50 downregulated pathways**      **G Top 50 upregulated pathways**

| Pathway                                           | Members | Changed | Z ratio | P value | Pathway                                     | Members | Changed | Z ratio | P value |
|---------------------------------------------------|---------|---------|---------|---------|---------------------------------------------|---------|---------|---------|---------|
| NUCLEAR_PART                                      | 579     | 468     | -7.07   | 0.000   | SYSTEM_DEVELOPMENT                          | 863     | 759     | 4.69    | 0.000   |
| DNA_METABOLIC_PROCESS                             | 257     | 226     | -6.49   | 0.000   | MULTICELLULAR_ORGANISMAL_DEVELOPMENT        | 1051    | 910     | 4.64    | 0.000   |
| DNA_REPLICATION                                   | 102     | 85      | -6.20   | 0.000   | SIYALYLTRANSFERASE_ACTIVITY                 | 10      | 10      | 4.59    | 0.000   |
| DNA_DEPENDENT_DNA_REPLICATION                     | 56      | 46      | -6.07   | 0.000   | PHOSPHOINOSITIDE_BINDING                    | 20      | 13      | 4.49    | 0.000   |
| DNA_REPAIR                                        | 125     | 111     | -5.98   | 0.000   | ANATOMICAL_STRUCTURE_DEVELOPMENT            | 1017    | 891     | 4.47    | 0.000   |
| NUCLEUS                                           | 1433    | 1169    | -5.95   | 0.000   | ORGAN_DEVELOPMENT                           | 572     | 499     | 4.28    | 0.000   |
| INTRACELLULAR_ORGANELLE_PART                      | 1192    | 988     | -5.82   | 0.000   | RECEPTOR_BINDING                            | 378     | 321     | 4.25    | 0.000   |
| RESPONSE_TO_DNA_DAMAGE_STIMULUS                   | 162     | 138     | -5.80   | 0.000   | EXTRACELLULAR_REGION                        | 448     | 374     | 4.10    | 0.000   |
| ORGANELLE_PART                                    | 1197    | 992     | -5.72   | 0.000   | ENZYME_LINKED_RECEPTOR_PROTEIN_SIGNALING_PA | 140     | 126     | 4.05    | 0.000   |
| NUCLEOBASE__NUCLEOSIDE__NUCLEOTIDE_AND_NUCLEIC_AC | 1246    | 1051    | -5.34   | 0.000   | GROWTH                                      | 77      | 63      | 3.85    | 0.000   |
| ORGANELLE_LUMEN                                   | 458     | 372     | -5.04   | 0.000   | NEGATIVE_REGULATION_OF_GROWTH               | 40      | 34      | 3.84    | 0.000   |
| MEMBRANE_ENCLOSED_LUMEN                           | 458     | 372     | -5.04   | 0.000   | FOCAL_ADHESION_FORMATION                    | 10      | 9       | 3.83    | 0.000   |
| CHROMOSOME                                        | 124     | 106     | -4.75   | 0.000   | OLIGOSACCHARIDE_METABOLIC_PROCESS           | 11      | 11      | 3.82    | 0.000   |
| CELL_CYCLE_PROCESS                                | 193     | 167     | -4.75   | 0.000   | EXTRACELLULAR_REGION_PART                   | 339     | 283     | 3.82    | 0.000   |
| NUCLEAR_LUMEN                                     | 387     | 310     | -4.74   | 0.000   | REGULATION_OF_SIGNAL_TRANSDUCTION           | 223     | 189     | 3.77    | 0.000   |
| CELL_CYCLE_GO_0007049                             | 315     | 268     | -4.63   | 0.000   | SYSTEM_PROCESS                              | 563     | 489     | 3.74    | 0.000   |
| RNA_PROCESSING                                    | 174     | 145     | -4.32   | 0.000   | EXTRACELLULAR_SPACE                         | 246     | 204     | 3.66    | 0.000   |
| BASE_EXCISION_REPAIR                              | 17      | 15      | -4.30   | 0.000   | NEURON_PROJECTION                           | 21      | 18      | 3.62    | 0.000   |
| CELL_CYCLE_PHASE                                  | 170     | 147     | -4.23   | 0.000   | INTERMEDIATE_FILAMENT_CYTOSKELETON          | 24      | 22      | 3.61    | 0.000   |
| RESPONSE_TO_ENDOGENOUS_STIMULUS                   | 200     | 168     | -4.18   | 0.000   | INTERMEDIATE_FILAMENT                       | 24      | 22      | 3.61    | 0.000   |
| MACROMOLECULAR_COMPLEX                            | 945     | 793     | -4.14   | 0.000   | SENSORY_PERCEPTION                          | 190     | 159     | 3.57    | 0.000   |
| NUCLEAR_CHROMOSOME                                | 54      | 45      | -4.11   | 0.000   | MEMBRANE                                    | 1998    | 1678    | 3.55    | 0.000   |
| STRUCTURE_SPECIFIC_DNA_BINDING                    | 56      | 45      | -4.08   | 0.000   | POSITIVE_REGULATION_OF_SECRETION            | 20      | 15      | 3.51    | 0.000   |
| DOUBLE_STRANDED_DNA_BINDING                       | 32      | 26      | -3.95   | 0.000   | REGULATION_OF_CELL_GROWTH                   | 46      | 38      | 3.49    | 0.000   |
| CELL_CYCLE_CHECKPOINT_GO_0000075                  | 48      | 38      | -3.92   | 0.000   | REGULATION_OF_GROWTH                        | 58      | 49      | 3.48    | 0.000   |
| TRNA_METABOLIC_PROCESS                            | 19      | 18      | -3.76   | 0.000   | SIGNAL_TRANSDUCTION                         | 1637    | 1394    | 3.47    | 0.001   |
| DNA_RECOMBINATION                                 | 47      | 45      | -3.69   | 0.000   | PLASMA_MEMBRANE                             | 1429    | 1199    | 3.46    | 0.001   |
| M_PHASE                                           | 114     | 100     | -3.67   | 0.000   | MESODERM_DEVELOPMENT                        | 22      | 17      | 3.45    | 0.001   |
| HYDROLASE_ACTIVITY__HYDROLYZING_N_GLYCOSYL_COMPOL | 10      | 10      | -3.63   | 0.000   | CELL_DEVELOPMENT                            | 579     | 512     | 3.44    | 0.001   |
| NUCLEOPLASM                                       | 279     | 230     | -3.62   | 0.000   | FOCAL_ADHESION                              | 13      | 10      | 3.44    | 0.001   |
| REPLICATION_FORK                                  | 18      | 16      | -3.60   | 0.000   | ANATOMICAL_STRUCTURE_MORPHOGENESIS          | 379     | 335     | 3.39    | 0.001   |
| CONDENSED_CHROMOSOME                              | 34      | 27      | -3.57   | 0.000   | NERVOUS_SYSTEM_DEVELOPMENT                  | 386     | 342     | 3.39    | 0.001   |
| TRNA_PROCESSING                                   | 10      | 9       | -3.51   | 0.000   | EARLY_ENDOSOME                              | 18      | 15      | 3.37    | 0.001   |
| RIBONUCLEOPROTEIN_COMPLEX                         | 143     | 116     | -3.49   | 0.000   | CYTOSKELETAL_PROTEIN_BINDING                | 159     | 137     | 3.36    | 0.001   |
| MITOTIC_CELL_CYCLE                                | 153     | 133     | -3.48   | 0.001   | TASTE_RECEPTOR_ACTIVITY                     | 15      | 3       | 3.36    | 0.001   |
| CHROMOSOMAL_PART                                  | 96      | 83      | -3.48   | 0.001   | AXON_GUIDANCE                               | 22      | 19      | 3.34    | 0.001   |
| NUCLEOLUS                                         | 126     | 97      | -3.47   | 0.001   | GENERATION_OF_NEURONS                       | 83      | 76      | 3.34    | 0.001   |
| NON_MEMBRANE_BOUND_ORGANELLE                      | 632     | 513     | -3.46   | 0.001   | CELL_JUNCTION                               | 83      | 67      | 3.29    | 0.001   |
| INTRACELLULAR_NON_MEMBRANE_BOUND_ORGANELLE        | 632     | 513     | -3.46   | 0.001   | LIPID_HOMEOSTASIS                           | 16      | 12      | 3.28    | 0.001   |
| RNA_BINDING                                       | 259     | 211     | -3.44   | 0.001   | PDZ_DOMAIN_BINDING                          | 14      | 13      | 3.26    | 0.001   |
| TRANSFERASE_ACTIVITY__TRANSFERRING_ONE_CARBON_GRC | 37      | 34      | -3.37   | 0.001   | LIGAND_DEPENDENT_NUCLEAR_RECEPTOR_ACTIVITY  | 25      | 23      | 3.26    | 0.001   |
| CONDENSED_NUCLEAR_CHROMOSOME                      | 18      | 15      | -3.36   | 0.001   | NEUROGENESIS                                | 93      | 84      | 3.21    | 0.001   |
| NUCLEOBASE__NUCLEOSIDE_AND_NUCLEOTIDE_METABOLIC_F | 52      | 45      | -3.35   | 0.001   | CELL_MATRIX_JUNCTION                        | 18      | 14      | 3.20    | 0.001   |
| METHYLTRANSFERASE_ACTIVITY                        | 36      | 33      | -3.30   | 0.001   | VACUOLE                                     | 69      | 56      | 3.19    | 0.001   |
| INTERPHASE                                        | 68      | 57      | -3.28   | 0.001   | IDENTICAL_PROTEIN_BINDING                   | 305     | 253     | 3.19    | 0.001   |
| NUCLEOTIDE_METABOLIC_PROCESS                      | 42      | 36      | -3.21   | 0.001   | CELL_MATRIX_ADHESION                        | 38      | 34      | 3.18    | 0.001   |
| DNA_INTEGRITY_CHECKPOINT                          | 24      | 16      | -3.20   | 0.001   | TRANSMEMBRANE_RECEPTOR_PROTEIN_TYROSINE_KII | 83      | 75      | 3.18    | 0.001   |
| SINGLE_STRANDED_DNA_BINDING                       | 35      | 27      | -3.17   | 0.002   | ACTIN_FILAMENT_BASED_PROCESS                | 116     | 96      | 3.18    | 0.001   |
| PROTEIN_COMPLEX                                   | 816     | 689     | -3.08   | 0.002   | CELL_SURFACE_RECEPTOR_LINKED_SIGNAL_TRANSDU | 642     | 547     | 3.17    | 0.002   |
| INTERPHASE_OF_MITOTIC_CELL_CYCLE                  | 62      | 52      | -3.07   | 0.002   | CELL_SUBSTRATE_ADHERENS_JUNCTION            | 16      | 13      | 3.17    | 0.002   |

**Supplementary Figure S3. Inhibition of Nampt in NSPCs impairs NAD<sup>+</sup> biosynthesis and proliferation *in vitro*.**

Neurospheres were cultured with the Nampt-specific inhibitor FK866 (10 nM) with or without NMN (100  $\mu$ M) for 24 (**A-B**) or 48 hours (**C-G**). **A**) HPLC analysis of NAD<sup>+</sup> levels (n=6). **B**) Quantification of the fold increase of cell number in neurospheres under each condition indicated (n=5-11). **C**) A representative immunoblot of FK866-treated neurospheres. **D-E**) Quantification of immunoblots for Ki67 (**D**) and PcnA (**E**) normalized by actin in neurospheres (n=6). **F-G**) Top 50 biological pathways downregulated (**F**) or upregulated (**G**) by FK866. Parametric analysis of gene enrichment (PAGE) was conducted based on microarray analyses. See the Methods section. Data are presented as mean  $\pm$  s.e.m. \*P < 0.05. \*\*P < 0.01. \*\*\*P < 0.001.
