# Supplementary material
Source: PubMed Central journal article supplement (PMC4194122)
Supplement: embj0033-1321-sd4.pdf [file embj0033-1321-sd4.pdf]

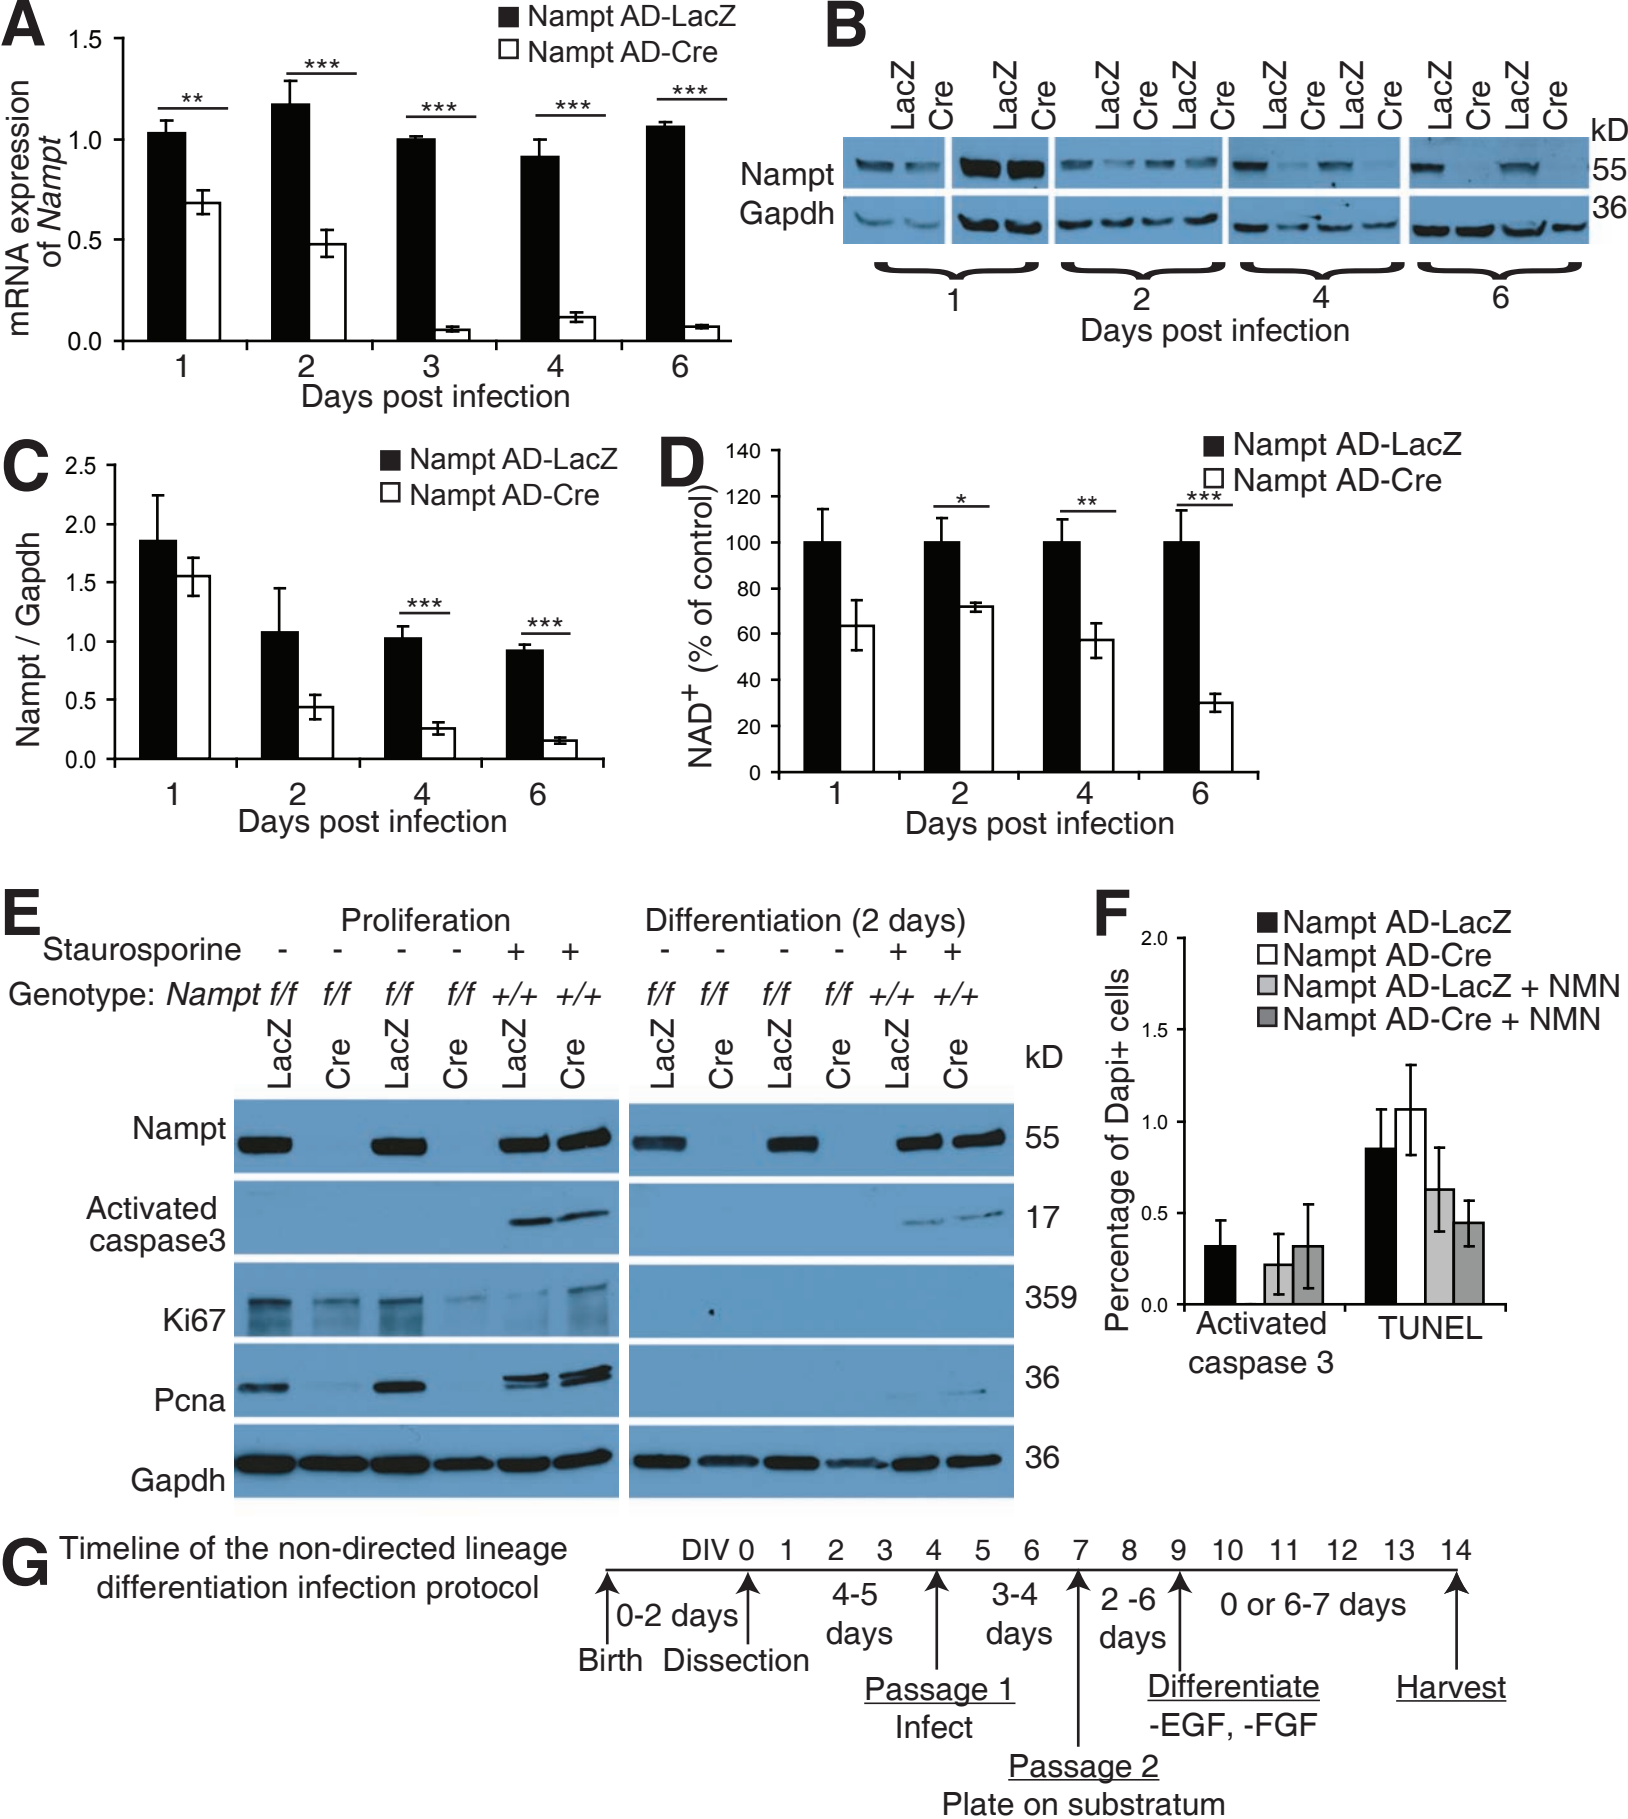

SUPPLEMENTARY FIGURE 4

**Supplementary Figure S4. Genetic ablation of *Nampt* in NSPCs *in vitro* impairs NAD<sup>+</sup> biosynthesis, proliferation, and differentiation.**

**A-G)** Neurospheres were isolated from *Nampt*<sup>fl<sup>ox</sup>/fl<sup>ox</sup></sup> (*f/f*) mice and infected with a Cre-recombinase expressing adenovirus (Nampt AD-Cre) or a control adenovirus expressing LacZ (Nampt AD-LacZ). Analyses were conducted after passage 2, at 6 or more days post infection.

**A)** Quantitative RT-PCR results for mRNA expression of Nampt in AD-LacZ and Nampt Ad-Cre infected neurospheres (n=3-33). **B)** Representative immunoblots for Nampt and Gapdh. **C)** Quantification of immunoblots for Nampt in neurospheres normalized by Gapdh (n=4-13). **D)** HPLC analysis of NAD<sup>+</sup> levels. NAD<sup>+</sup> levels in Nampt Ad-Cre infected neurospheres were normalized by NAD<sup>+</sup> levels in Nampt Ad-LacZ infected neurospheres (n=4-9). **E)** Representative immunoblots of Nampt Ad-Cre or Nampt AD-LacZ infected neurospheres 8 days post infection for markers of cell death (activated caspase 3) and proliferation (Ki67, Pcna). Neurospheres were grown under proliferation conditions (left blot) or differentiated for 2 days (right blot). As a positive control for activated caspase 3 immunoreactivity, indicated samples isolated from *Nampt*<sup>+/+</sup> mice were treated with staurosporine (1 mM) (n=6). **F)** Immunofluorescence analysis of dissociated neurospheres cultured in proliferation media. Histogram shows the percentages of activated caspase 3+ (n=3 independent samples, 6 fields of view) or TUNEL+ cells (n=9 independent samples, 14-21 fields of view) relative to the total number of Dapi+ cells. **G)** A scheme for the non-directed lineage differentiation protocol used.

Data are presented as mean ± s.e.m. \*P < 0.05. \*\*P < 0.01. \*\*\*P < 0.001.
