# Supplementary material
Source: PubMed Central journal article supplement (PMC4194122)
Supplement: embj0033-1321-sd5.pdf [file embj0033-1321-sd5.pdf]

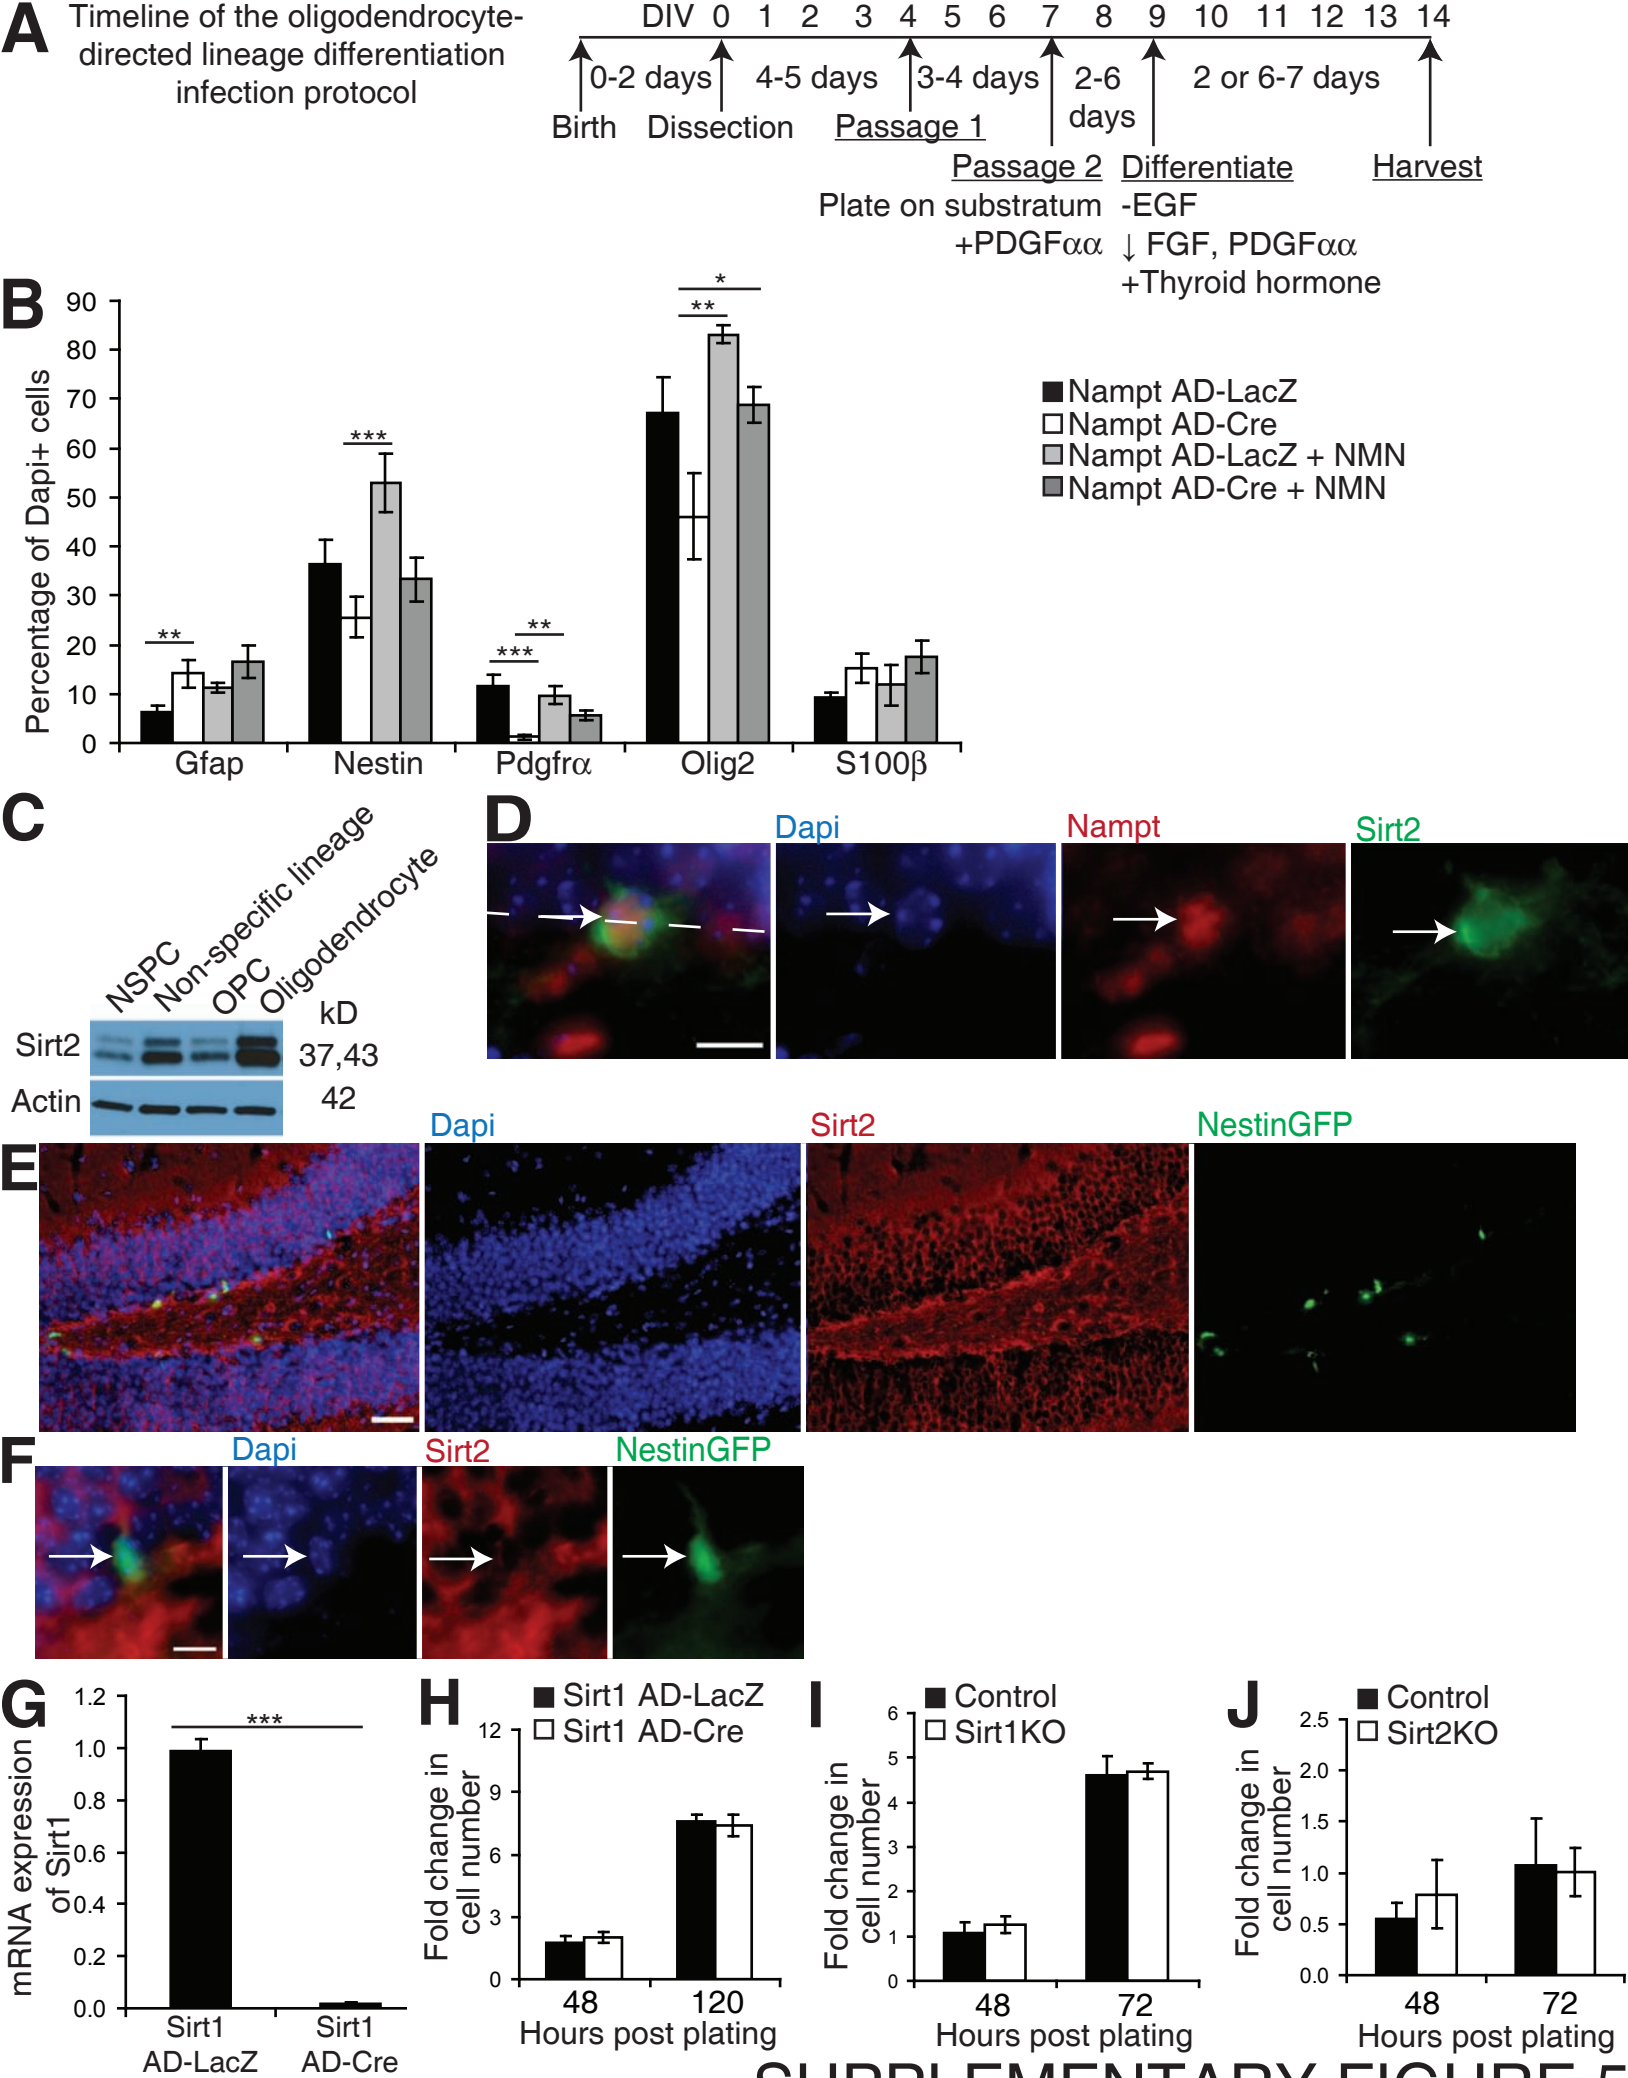

**Supplementary Figure S5. Genetic ablation of *Nampt* *in vitro* impairs OPC formation.**

**A)** A scheme for the oligodendrocytic lineage differentiation protocol used. Neurospheres were isolated from *Nampt*<sup>fllox/fllox</sup> mice and infected with a Cre-recombinase expressing adenovirus (Nampt AD-Cre) or a control adenovirus expressing LacZ (Nampt AD-LacZ). **B)** Dissociated neurospheres were cultured in proliferation media containing PDGF $\alpha\alpha$  and assessed by immunofluorescence. Histogram shows the percentages of Dapi+ cells that express markers of NSPCs (Gfap, Nestin), OPCs (Pdgfra<sup>+</sup>, Olig2<sup>+</sup>), and astrocytes (S100 $\beta$ ) (n=3-12 independent samples, 6-30 fields of view). **C)** A representative immunoblot for Sirt2 in neurospheres cultured as NSPCs (with EGF, FGF) or OPCs (with EGF, FGF, PDGF $\alpha\alpha$ ) before and after differentiation. **D)** Immunofluorescence for Dapi (blue), Nampt (red), and Sirt2 (green) along the SGZ. Dotted lines denote the SGZ. Single arrowheads indicate examples of colocalization of cell immunoreactivity. Scale bar denotes 10  $\mu$ m. **E-F)** Immunofluorescence for Dapi (blue), Sirt2 (red), and NestinGFP (green, 3 days post TAM) along the SGZ. Dotted lines denote the SGZ. **E)** Scale bar denotes 50  $\mu$ m. **F)** Scale bar denotes 20  $\mu$ m. **G-H)** Neurospheres were isolated from *Sirt1*<sup>fllox/fllox</sup> mice and infected with a Cre recombinase-expressing adenovirus (Sirt1 AD-Cre) or a control adenovirus expressing LacZ (Sirt1 AD-LacZ). **G)** Quantitative RT-PCR results for mRNA expression of Sirt1 (n=17-24). **H-J)** Quantification of the fold increase in cell number (n=5-20). Neurospheres were derived from full body Sirt1 KO mice (**I**), Sirt2 KO (**J**) mice, and their respective littermate controls. Data are presented as mean  $\pm$  s.e.m. \*P < 0.05. \*\*P < 0.01. \*\*\*P < 0.001.
