# Supplementary material
Source: PubMed Central journal article supplement (PMC4194122)
Supplement: embj0033-1321-sd6.pdf [file embj0033-1321-sd6.pdf]

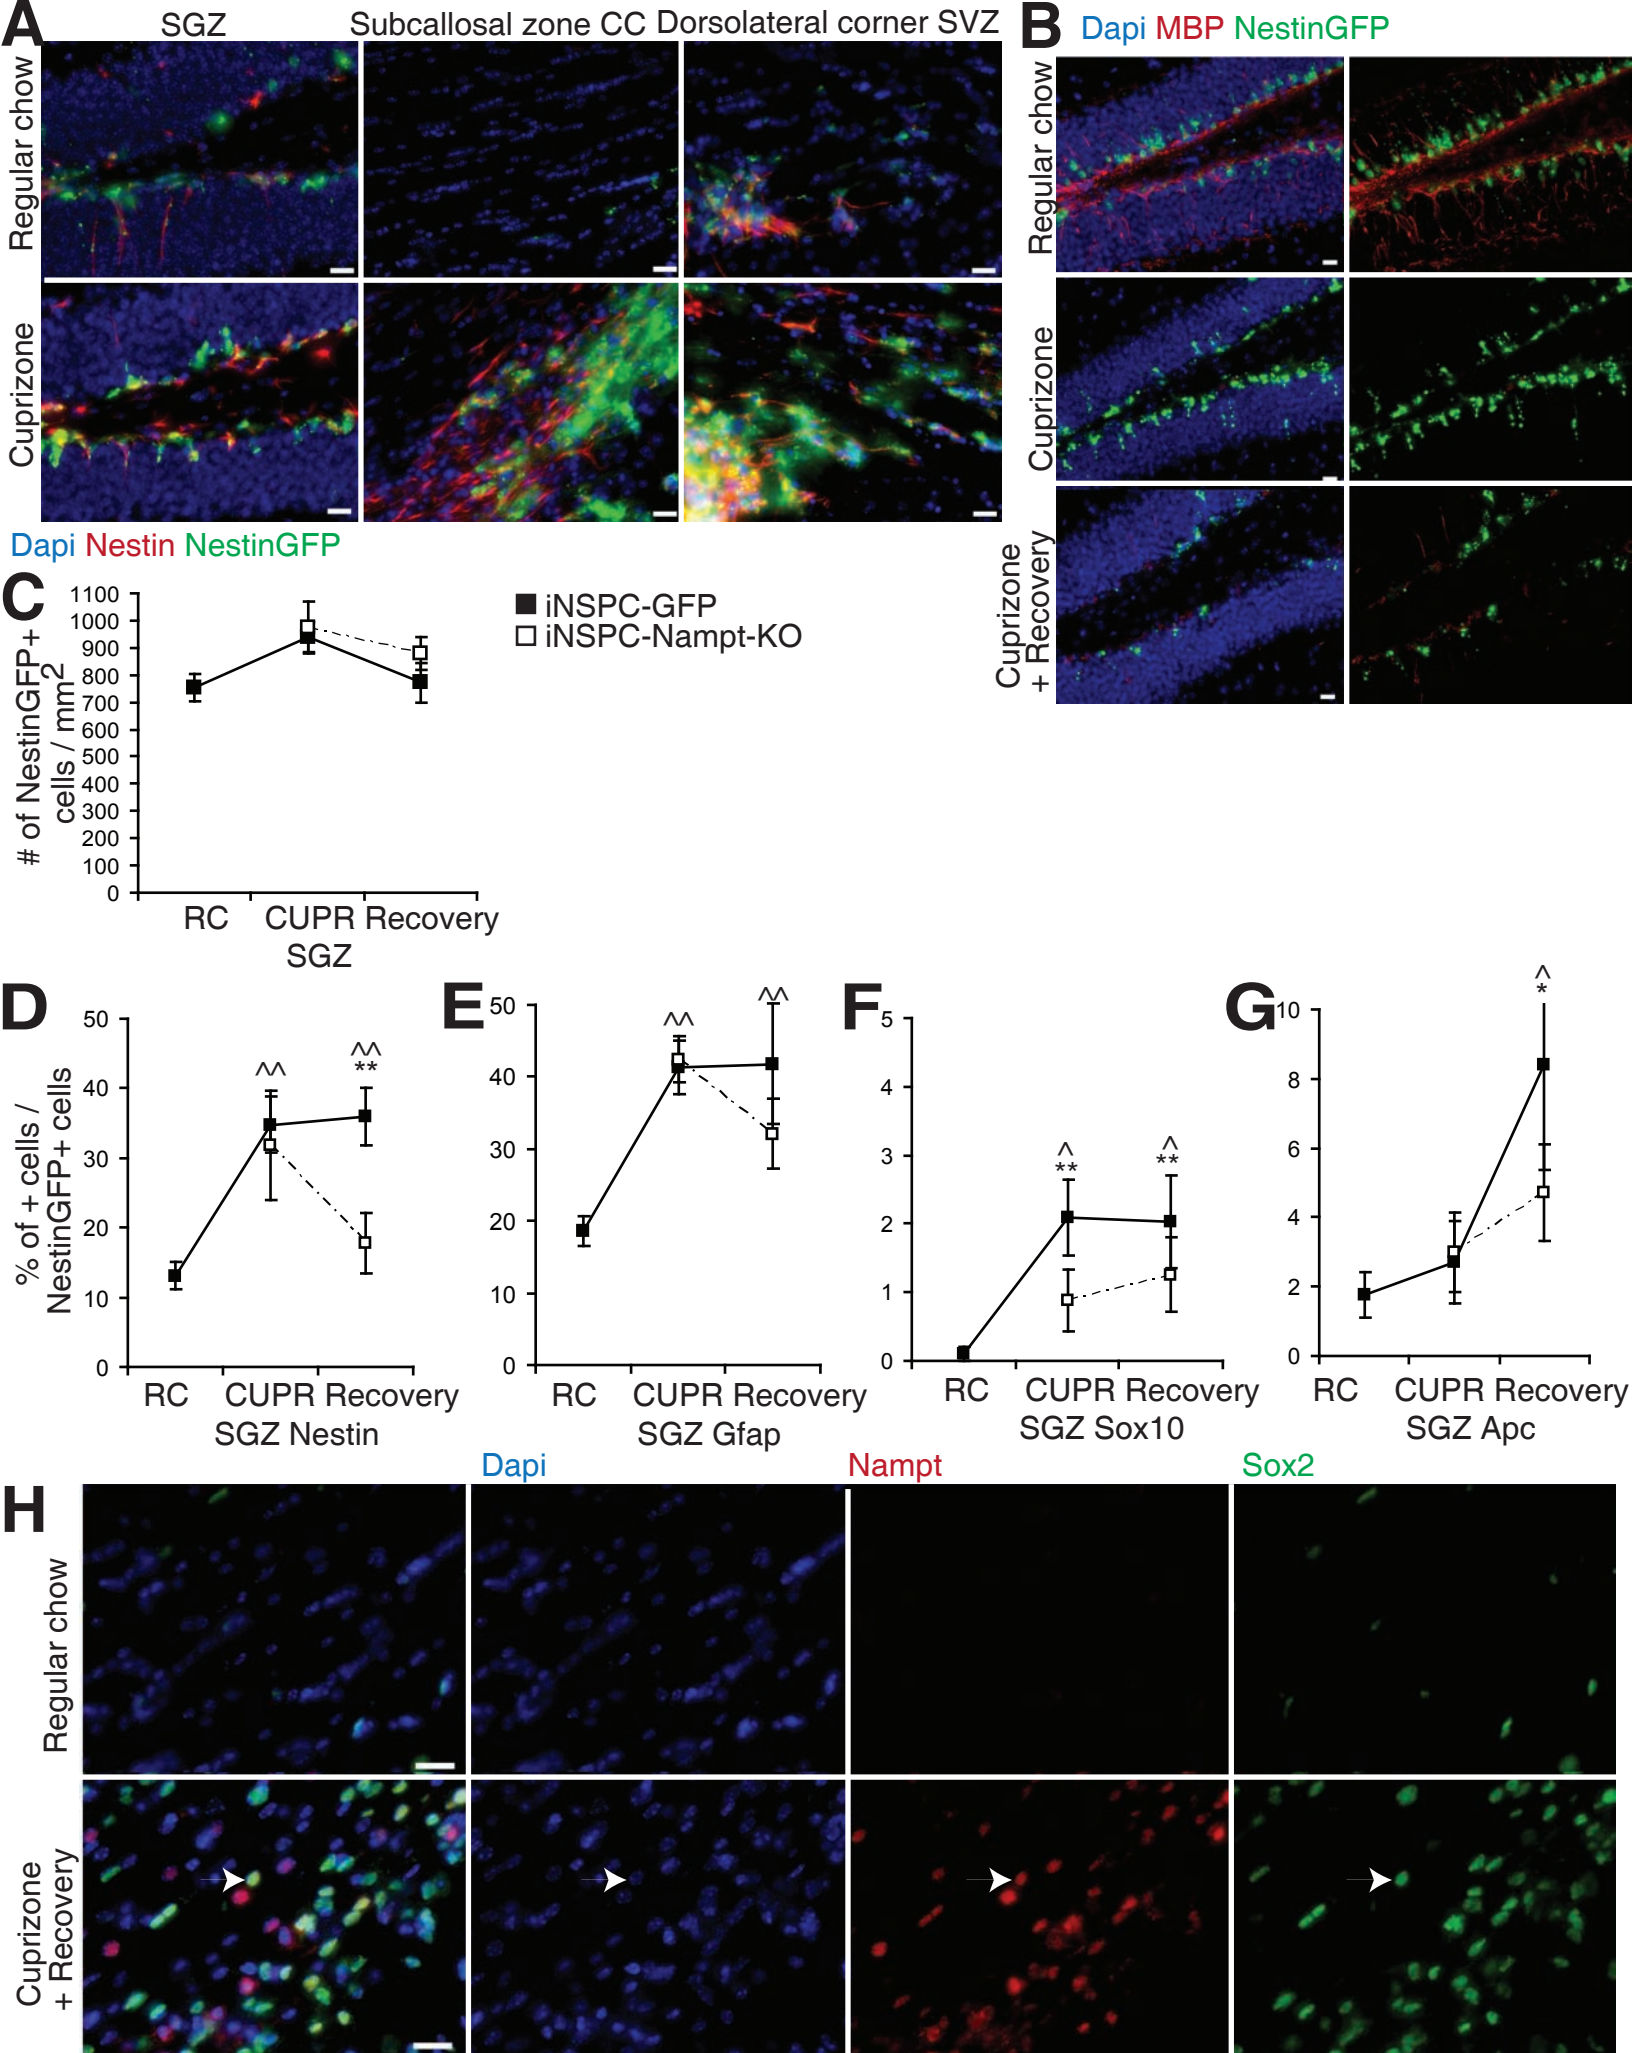

SUPPLEMENTARY FIGURE 6

**Supplementary Figure S6. Adult NSPC specific deletion of *Nampt* impairs NSPC self-renewal in response to insult-induced demyelination *in vivo*.**

**A)** Representative images of immunofluorescence for Dapi (blue), Nestin (red), and NestinGFP (green), and in regular chow (RC) and cuprizone fed (CUPR) mice in the indicated regions of the brain: SGZ, subgranular zone; SVZ, subventricular zone; CC, corpus callosum. Scale bars denote 20  $\mu$ m. **B)** Representative images of immunofluorescence for Dapi (blue), MBP (red), and NestinGFP (green) in regular chow- and cuprizone-fed mice before and after 1 week of recovery (Recovery) in the SGZ. Scale bars denote 20  $\mu$ m. **C-G)** Quantification of the number of NestinGFP+ cells per unit area of the dentate gyrus (**C**) and percentages of NestinGFP+ cells that express NSPC markers (Nestin, Gfap) or oligodendrocyte markers (Sox10, Apc) in the SGZ (**D-G**) (n=5-12 mice). \* and ^ indicate statistical significance between iNSPC-GFP control littermates and iNSPC-Nampt-KO mice and between regular chow- and cuprizone-fed iNSPC-GFP mice, respectively. **H)** Representative images of immunofluorescence for Dapi (blue), Nampt (red), and Sox2 (green) in the CC. Arrows indicate examples of colocalization of immunoreactivity. Scale bars denote 20  $\mu$ m. Data are presented as mean  $\pm$  s.e.m. \*P < 0.05. \*\*· ^P < 0.01. \*\*\*· ^^^P < 0.001.
